# Supplementary material for: Time- and momentum-resolved image-potential states of 2H-MoS2 surface
Source: Royal Society of Chemistry journal article supplement (doi:10.1039/d1cp03527d), 2021-01-01
Supplement: d1cp03527d1.pdf [file d1cp03527d1.pdf]

Supporting Information:

Time- and Momentum-Resolved Image-Potential States of 2H-MoS<sub>2</sub>

Surface

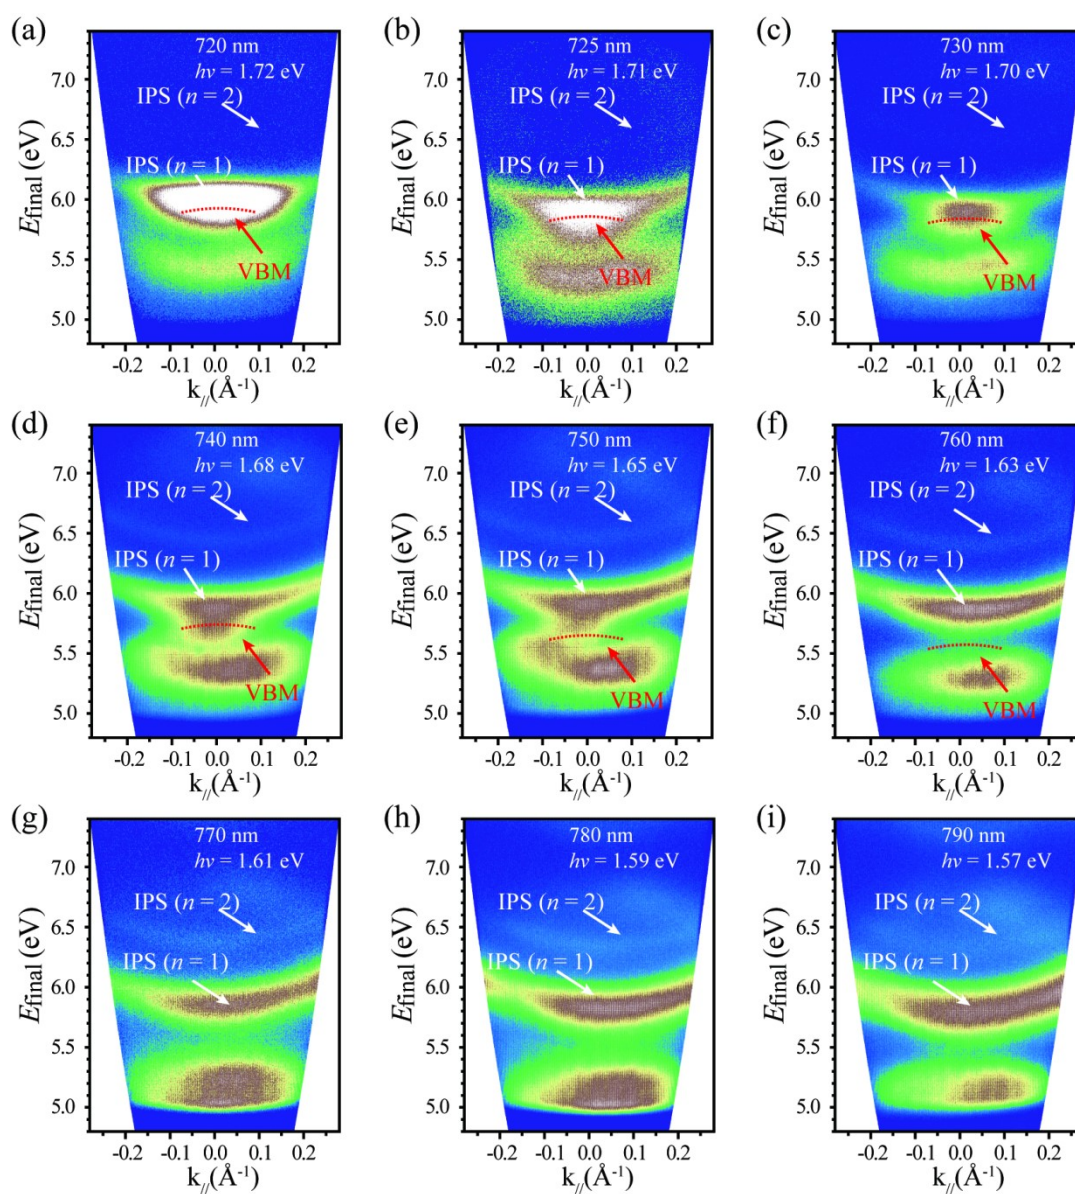

**Fig. S1** (a)-(i) Momentum-resolved multi-photon photoemission spectroscopies with tunable excitation source with photon energy from 1.72 eV to 1.57 eV, respectively.

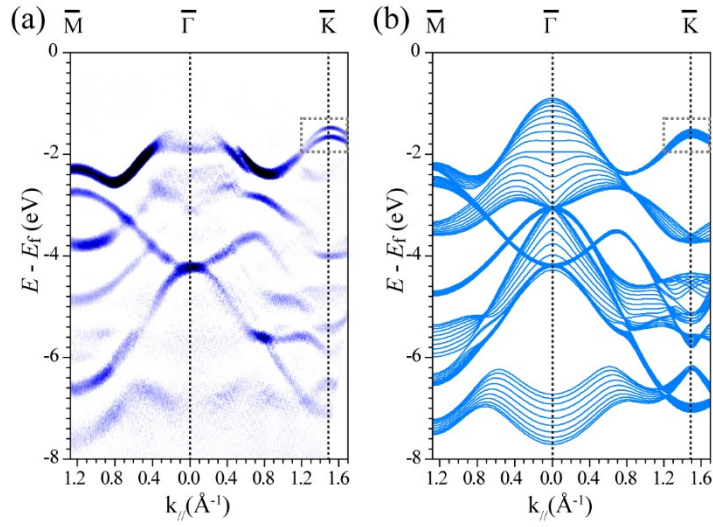

**Fig. S2** (a) Experimental ARPES result measured with the He lamp. (b) Calculated band structure in occupied states of bulk  $2H$ -MoS<sub>2</sub>.

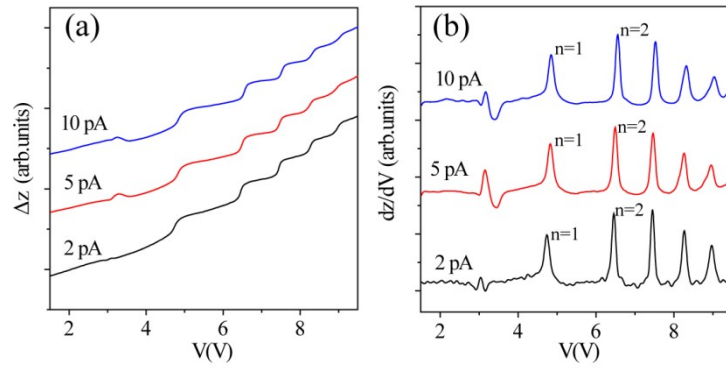

**Fig. S3** (a) Distance-voltage characteristics on the clean MoS<sub>2</sub> surface measured at different constant-current setpoints. (b) Numerically differential  $dz/dV$  curves in (a), where the IPS  $n=1$  and  $n=2$  states are marked. It is noticed that the feature around 3V could correspond to the energy distribution of the conduction bands in the MoS<sub>2</sub> band structure [Fig. 2(c)].
